4. Huber, G. L., and Finley, T. N.: Effect of isotonic saline on the alveolar architecture (Abstract). *ANESTHESIOLOGY* 26: 252, 1965.
5. Giammona, S. T., and Modell, J. H.: The effects of drowning by total immersion in fresh and sea water on pulmonary surfactant, in preparation.
6. Modell, J. H., Giammona, S. T., and Alvarez, L. A.: Effects of ultrasonic nebulized suspensions on pulmonary surfactant, *Dis. Chest* 50: 627, 1966.
7. Giammona, S. T., Mandelbaum, I., Foy, J., and Bondurant, S.: Effects of pulmonary artery ligation on pulmonary surfactant and pressure volume characteristics of dog lung, *Circ. Res.* 18: 683, 1966.
8. Gruenwald, P.: A numerical index of the stability of lung expansion, *J. Appl. Physiol.* 18: 665, 1963.
9. Bondurant, S., and Miller, D. A.: A method for producing surface active extracts of mammalian lungs, *J. Appl. Physiol.* 17: 167, 1962.
10. Clements, J. A.: Surface tension of lung extracts, *Proc. Soc. Exp. Biol. Med.* 95: 170, 1957.
11. Clements, J. A., Husted, R. F., Johnson, R. P., and Gribetz, I.: Pulmonary surface tension and alveolar stability, *J. Appl. Physiol.* 16: 444, 1961.
12. Modell, J. H., Moya, F., Newby, E. J., Ruiz, B. C., and Showers, A. V.: Effects of fluid volume in sea water drowning, *Ann. Intern. Med.*, In press.
13. Modell, J. H., and Moya, F.: Effects of volume of aspirated fluid during chlorinated fresh water drowning, *ANESTHESIOLOGY* 27: 662, 1966.

---

### Drugs

**DOXAPRAM** In awake normal adult males doxapram was found to augment the ventilatory response to carbon dioxide when given at a constant intravenous rate. An increase in minute ventilation and a parallel shift to the left of the ventilatory response curve was noted. This indicates a lowering of the threshold of the respiratory center to CO<sub>2</sub> stimulation. In similar subjects not challenged by CO<sub>2</sub>, intravenous administration of doxapram was associated with marked increased in alveolar ventilation, falls in arterial P<sub>CO<sub>2</sub></sub>, increases in arterial pH, and increases in arterial P<sub>O<sub>2</sub></sub>. There appeared a wide margin between therapeutic and toxic levels. (Steele, A. D., and others: *The Effect of a New Analeptic Agent on Arterial Blood Gases and Minute Ventilation in Adult Males*, *Amer. Rev. Resp. Dis.* 94: 600 (Oct.) 1966.)

**DOXAPRAM** In awake normal males doxapram was found to augment the incidence of succinylcholine-induced muscle pain from 42.5 per cent to 6.8 per cent. (Tonsa, A.: *Prevention of Muscle Pain Caused by Succinylcholine with Diazepam*, *Der Anesthetist* 15: 363 (Nov.) 1966.)
